# Supplementary material for: Pipamperone Population Pharmacokinetics Related to Effectiveness and Side Effects in Children and Adolescents
Source: Springer Nature journal article supplement (doi:10.1007/s40262-020-00894-y), 2020-05-11

*Clinical Pharmacokinetics*

## **Pipamperone population pharmacokinetics related to effectiveness and side-effects in children and adolescents**

Sanne M. Kloosterboer<sup>1,2</sup>, Karin M. Egberts<sup>3</sup>, Brenda C.M. de Winter<sup>1</sup>, Teun van Gelder<sup>1</sup>, Manfred Gerlach<sup>3</sup>, Manon H.J. Hillegers<sup>2</sup>, Gwen C. Dieleman<sup>2</sup>, Soma Bahmany<sup>1</sup>, Catrien G. Reichart<sup>4</sup>, Emma van Daalen<sup>5</sup>, Mirjam E.J. Kouijzer<sup>6</sup>, Bram Dierckx<sup>2</sup>, Birgit C.P. Koch<sup>1</sup>

<sup>1</sup>Department of Hospital Pharmacy, Erasmus MC, University Medical Center Rotterdam, Rotterdam, The Netherlands

<sup>2</sup>Department of Child and Adolescent Psychiatry/Psychology, Erasmus MC, University Medical Center Rotterdam, Rotterdam, the Netherlands

<sup>3</sup> Department of Child and Adolescent Psychiatry, Psychosomatics and Psychotherapy, University Hospital Würzburg, Center of Mental Health, Würzburg, Germany

<sup>4</sup> Curium-LUMC Child and Adolescent Psychiatry, Leiden University Medical Center, Leiden, The Netherlands

<sup>5</sup> Yulius Mental Health, Dordrecht, The Netherlands

<sup>6</sup> GGz Breburg, Centre of Youth, Breda, the Netherlands

### **Corresponding author:**

Sanne Maartje Kloosterboer

Department of Hospital Pharmacy, Erasmus MC, University Medical Center Rotterdam

Dr.Molewaterplein 40

3015 GD Rotterdam, The Netherlands

[s.kloosterboer@erasmusmc.nl](mailto:s.kloosterboer@erasmusmc.nl)

**Figure S1:** Goodness Of Fit plots – external validation

**Figure S1a:** External validation: measured concentrations versus population predictions.

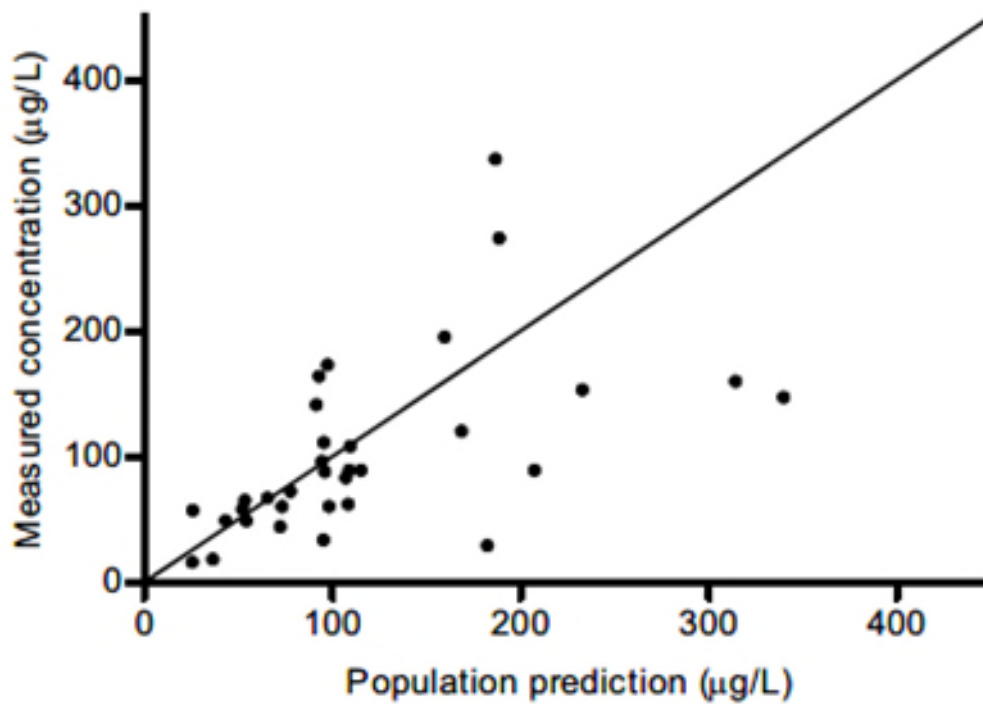

**Figure S1b:** External validation: measured concentrations versus individual predictions.

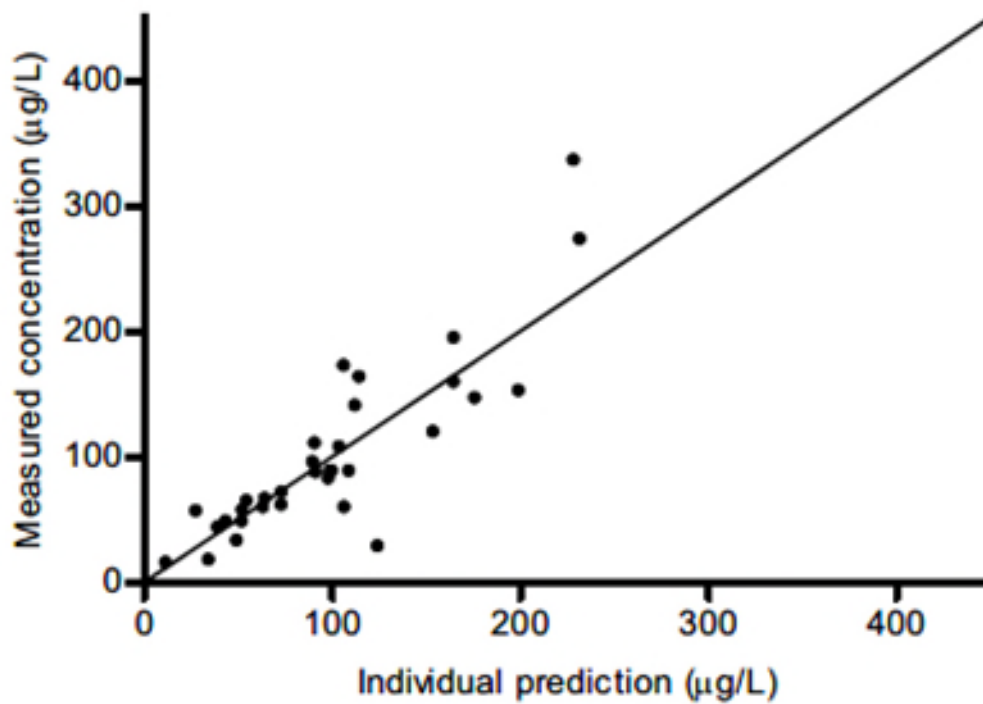

**Figure S1c:** External validation: the correlation of conditional weighted residuals (CWRES) with time

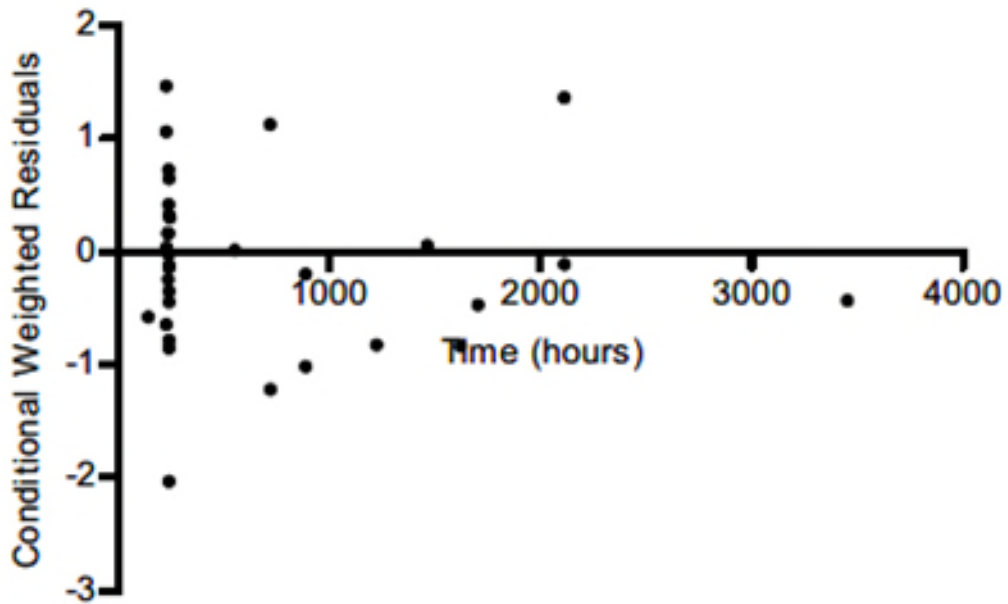

**Figure S1d:** External validation: the correlation of conditional weighted residuals with population predicted concentrations

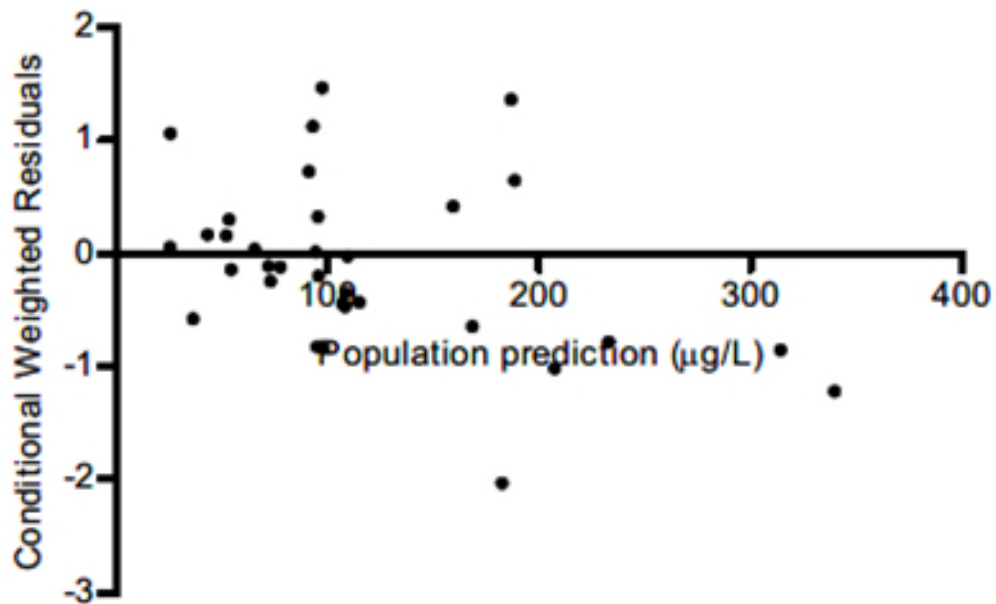

**Figure S2:** Normalized prediction distribution errors (npde) of external validation

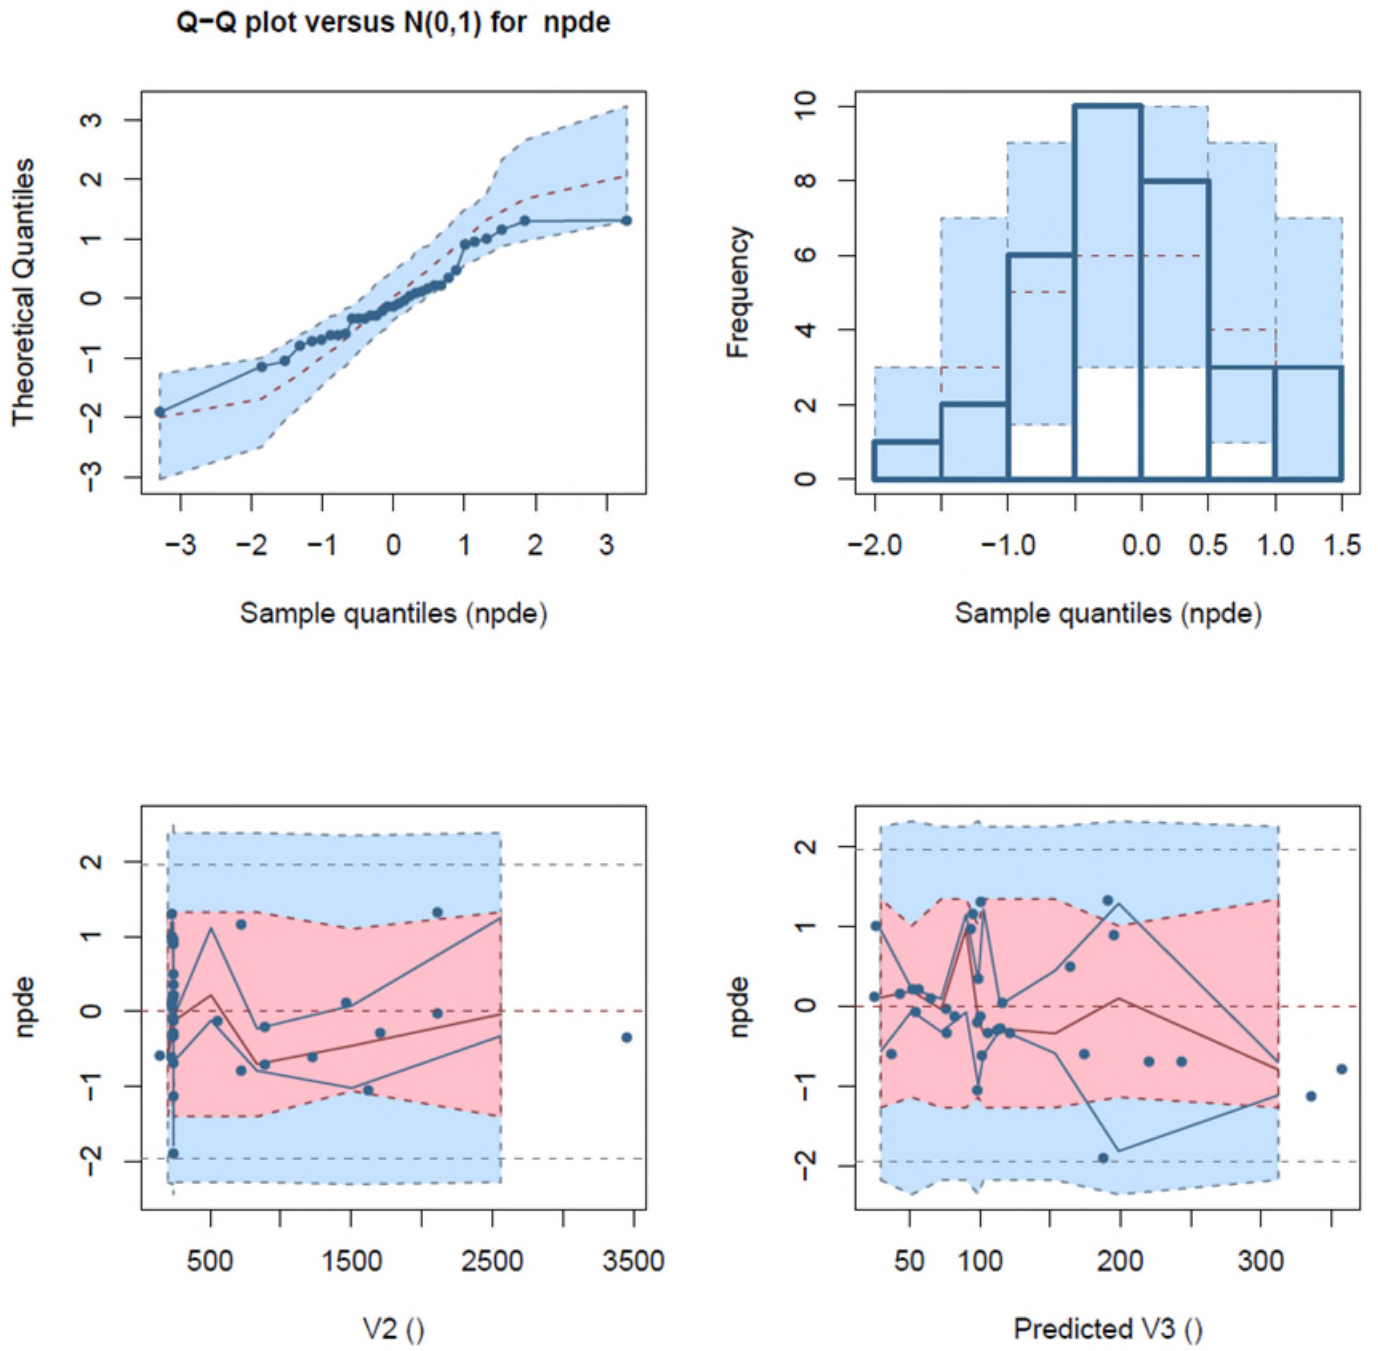

Supplement: MOESM1 [file 17971236]
